# Supplementary material for: Metagenomic data reveals type I polyketide synthase distributions across biomes
Source: PubMed Central journal article supplement (PMC10308959; doi:10.1128/msystems.00012-23), 2023-06-05
Supplement: msystems.00012-23-s0001.pdf [file msystems.00012-23-s0001.pdf]

| Study Name                                                                                                                     | Metagenome Size (Base Pairs) | Biome                     | Accession number(s)                                        |
|--------------------------------------------------------------------------------------------------------------------------------|------------------------------|---------------------------|------------------------------------------------------------|
| Hardwood forest soil microbial communities from Morgan-Monroe State Forest, Indiana, United States                             | 3,204,058,601                | Forest / Agriculture Soil | 3300032180                                                 |
| Hardwood forest soil microbial communities from Morgan-Monroe State Forest, Indiana, United States                             | 1,885,256,956                | Forest / Agriculture Soil | 3300032205                                                 |
| Hardwood forest soil microbial communities from Morgan-Monroe State Forest, Indiana, United States                             | 1,298,045,371                | Forest / Agriculture Soil | 3300031715                                                 |
| Hardwood forest soil microbial communities from Morgan-Monroe State Forest, Indiana, United States                             | 1,459,061,319                | Forest / Agriculture Soil | 3300031754                                                 |
| Hardwood forest soil microbial communities from Morgan-Monroe State Forest, Indiana, United States                             | 1,474,821,223                | Forest / Agriculture Soil | 3300031718                                                 |
| Soil microbial communities from agricultural site in Penn Yan, New York, United States                                         | 1,390,993,318                | Forest / Agriculture Soil | 3300033551                                                 |
| Soil microbial communities from agricultural site in Penn Yan, New York, United States                                         | 1,285,422,822                | Forest / Agriculture Soil | 3300030336                                                 |
| Soil microbial communities from agricultural site in Penn Yan, New York, United States                                         | 1,522,946,930                | Forest / Agriculture Soil | 3300033550                                                 |
| Forest soil microbial communities from Eldorado National Forest, California, USA                                               | 1,084,380,358                | Forest / Agriculture Soil | 3300035687                                                 |
| Forest soil microbial communities from Eldorado National Forest, California, USA                                               | 999,898,556                  | Forest / Agriculture Soil | 3300034268                                                 |
| Forest soil microbial communities from Eldorado National Forest, California, USA                                               | 1,071,649,480                | Forest / Agriculture Soil | 3300035667                                                 |
| Forest soil microbial communities from Barre Woods Harvard Forest LTER site, Petersham, Massachusetts, United States           | 1,455,646,258                | Forest / Agriculture Soil | 3300020579                                                 |
| Forest soil microbial communities from Barre Woods Harvard Forest LTER site, Petersham, Massachusetts, United States           | 1,494,582,847                | Forest / Agriculture Soil | 3300021171                                                 |
| Forest soil microbial communities from Barre Woods Harvard Forest LTER site, Petersham, Massachusetts, United States           | 1,558,207,418                | Forest / Agriculture Soil | 3300021168                                                 |
| Forest soil microbial communities from Barre Woods Harvard Forest LTER site, Petersham, Massachusetts, United States           | 1,363,538,788                | Forest / Agriculture Soil | 3300020582                                                 |
| Soil microbial communities from LAMPS site, Iowa State University, Ames, IA, USA                                               | 1,347,980,442                | Forest / Agriculture Soil | 3300037444                                                 |
| Soil microbial communities from LAMPS site, Iowa State University, Ames, IA, USA                                               | 1,401,762,085                | Forest / Agriculture Soil | 3300037529                                                 |
| Soil microbial communities from LAMPS site, Iowa State University, Ames, IA, USA                                               | 1,527,241,072                | Forest / Agriculture Soil | 3300037523                                                 |
| Soil microbial communities from LAMPS site, Iowa State University, Ames, IA, USA                                               | 1,490,249,658                | Forest / Agriculture Soil | 3300037803                                                 |
| Soil microbial communities from Everglades Agricultural Area, Florida, United States                                           | 1,179,311,592                | Forest / Agriculture Soil | 3300036759                                                 |
| Soil microbial communities from Everglades Agricultural Area, Florida, United States                                           | 1,305,585,406                | Forest / Agriculture Soil | 3300036838                                                 |
| Soil microbial communities from Everglades Agricultural Area, Florida, United States                                           | 1,152,188,752                | Forest / Agriculture Soil | 3300036840                                                 |
| Wetland soil microbial communities from Old Woman Creek delta, Ohio, United States                                             | 2,115,715,718                | Peat Soil                 | 3300033419                                                 |
| Wetland soil microbial communities from Old Woman Creek delta, Ohio, United States                                             | 1,217,355,322                | Peat Soil                 | 3300033483                                                 |
| Wetland soil microbial communities from Old Woman Creek delta, Ohio, United States                                             | 1,690,667,107                | Peat Soil                 | 3300033485                                                 |
| Wetland soil microbial communities from Old Woman Creek delta, Ohio, United States                                             | 1,546,155,278                | Peat Soil                 | 3300033414                                                 |
| Wetland soil microbial communities from Old Woman Creek delta, Ohio, United States                                             | 1,099,733,367                | Peat Soil                 | 3300033488                                                 |
| Peat permafrost microbial communities from Stordalen Mire near Abisko, Sweden                                                  | 1,299,338,055                | Peat Soil                 | 3300030739                                                 |
| Peat permafrost microbial communities from Stordalen Mire near Abisko, Sweden                                                  | 1,607,780,293                | Peat Soil                 | 3300031261                                                 |
| Peat permafrost microbial communities from Stordalen Mire near Abisko, Sweden                                                  | 2,638,818,371                | Peat Soil                 | 3300030906                                                 |
| Peat permafrost microbial communities from Stordalen Mire near Abisko, Sweden                                                  | 2,731,153,271                | Peat Soil                 | 3300031788                                                 |
| Peat permafrost microbial communities from Stordalen Mire near Abisko, Sweden                                                  | 1,367,811,048                | Peat Soil                 | 3300030019                                                 |
| Arctic peat soil microbial communities from the Barrow Environmental Observatory site, Barrow, Alaska, USA                     | 2,085,521,650                | Peat Soil                 | 3300006642, 3300025888, 3300006638, 3300006950             |
| Rhizosphere microbial communities from Carex aquatilis grown in University of Washington, Seattle, WA, United States           | 1,337,432,620                | Peat Soil                 | 3300031344                                                 |
| Rhizosphere microbial communities from Carex aquatilis grown in University of Washington, Seattle, WA, United States           | 1,456,417,438                | Peat Soil                 | 3300028800                                                 |
| Rhizosphere microbial communities from Carex aquatilis grown in University of Washington, Seattle, WA, United States           | 1,716,094,089                | Peat Soil                 | 3300031711, 3300031712                                     |
| Tropical peat soil microbial communities from peatlands in Loreto, Peru                                                        | 2,435,655,096                | Peat Soil                 | 3300035643, 3300033805, 3300033806, 3300033977             |
| Soil microbial communities from Populus trichocarpa stands in riparian zone in the Pacific Northwest, United States            | 1,733,731,890                | Peat Soil                 | 3300028802, 3300031226, 3300031455                         |
| Peat soil microbial communities from wetlands in Alaska, United States                                                         | 1,390,497,852                | Peat Soil                 | 3300034163, 3300034196, 3300035209                         |
| Populus rhizosphere microbial communities from soil in Oregon, United States                                                   | 2,047,615,555                | Rhizosphere               | 3300036401                                                 |
| Populus rhizosphere microbial communities from soil in Oregon, United States                                                   | 1,243,199,825                | Rhizosphere               | 3300035692                                                 |
| Populus rhizosphere microbial communities from soil in Oregon, United States                                                   | 1,094,358,263                | Rhizosphere               | 3300035695                                                 |
| Populus rhizosphere microbial communities from soil in Oregon, United States                                                   | 1,089,247,126                | Rhizosphere               | 3300035725                                                 |
| Populus rhizosphere microbial communities from soil in Oregon, United States                                                   | 1,597,279,552                | Rhizosphere               | 3300037068                                                 |
| Corn rhizosphere microbial communities from Kellogg Biological Station, Michigan, USA                                          | 1,516,673,119                | Rhizosphere               | 3300025917                                                 |
| Corn rhizosphere microbial communities from Kellogg Biological Station, Michigan, USA                                          | 1,561,591,177                | Rhizosphere               | 3300025919                                                 |
| Switchgrass rhizosphere microbial communities from Kellogg Biological Station, Michigan, USA                                   | 1,967,954,971                | Rhizosphere               | 3300025923                                                 |
| Switchgrass rhizosphere microbial communities from Kellogg Biological Station, Michigan, USA                                   | 1,595,709,255                | Rhizosphere               | 3300025931                                                 |
| Switchgrass rhizosphere microbial communities from Kellogg Biological Station, Michigan, USA                                   | 2,410,994,453                | Rhizosphere               | 3300005719                                                 |
| Switchgrass rhizosphere microbial communities from Kellogg Biological Station, Michigan, USA                                   | 1,861,559,781                | Rhizosphere               | 3300025986                                                 |
| Miscanthus rhizosphere microbial communities from Kellogg Biological Station, Michigan, USA                                    | 1,638,079,859                | Rhizosphere               | 3300025926                                                 |
| Miscanthus rhizosphere microbial communities from Kellogg Biological Station, Michigan, USA                                    | 1,485,183,434                | Rhizosphere               | 3300025935                                                 |
| Miscanthus rhizosphere microbial communities from Kellogg Biological Station, Michigan, USA                                    | 1,136,041,079                | Rhizosphere               | 3300005328                                                 |
| Miscanthus rhizosphere microbial communities from Kellogg Biological Station, Michigan, USA                                    | 1,786,668,392                | Rhizosphere               | 3300005338                                                 |
| Rhizosphere microbial communities from Vellozia epidendroides in rupestrian grasslands, the National Park of Serra do Cipó, Br | 957,257,553                  | Rhizosphere               | 3300021358, 3300021361, 3300021441                         |
| Maize rhizosphere microbial communities from greenhouse at UC Davis, California, United States                                 | 1,250,286,332                | Rhizosphere               | 3300031903                                                 |
| Maize rhizosphere microbial communities from greenhouse at UC Davis, California, United States                                 | 1,611,017,323                | Rhizosphere               | 3300031652                                                 |
| Arabidopsis thaliana rhizosphere microbial communities from the Joint Genome Institute, USA, that affect carbon cycling        | 987,377,510                  | Rhizosphere               | 3300027865, 3300027682, 3300027695, 3300027717, 3300027876 |
| Populus root and rhizosphere microbial communities from Tennessee, USA                                                         | 1,372,540,525                | Rhizosphere               | 3300027907                                                 |
| Sediment microbial communities from Yellowstone Lake                                                                           | 3,482,940,763                | Freshwater Sediment       | 3300032516                                                 |
| Sediment microbial communities from Yellowstone Lake                                                                           | 1,558,865,242                | Freshwater Sediment       | 3300035688                                                 |
| Sediment microbial communities from Yellowstone Lake                                                                           | 1,301,812,343                | Freshwater Sediment       | 3300031885                                                 |
| Sediment microbial communities from Yellowstone Lake                                                                           | 2,118,061,919                | Freshwater Sediment       | 3300032046                                                 |
| Sediment microbial communities from Loxahatchee National Wildlife Refuge, Florida, United States                               | 1,356,943,438                | Freshwater Sediment       | 3300038410                                                 |
| Sediment microbial communities from Loxahatchee National Wildlife Refuge, Florida, United States                               | 1,274,909,464                | Freshwater Sediment       | 3300038550                                                 |
| Sediment microbial communities from Loxahatchee National Wildlife Refuge, Florida, United States                               | 1,953,865,168                | Freshwater Sediment       | 3300038408                                                 |
| Sediment microbial communities from Loxahatchee National Wildlife Refuge, Florida, United States                               | 1,686,876,318                | Freshwater Sediment       | 3300038455                                                 |
| Sediment microbial communities from Loxahatchee National Wildlife Refuge, Florida, United States                               | 3,028,796,679                | Freshwater Sediment       | 3300038552                                                 |
| Freshwater lake sediment microbial communities from the University of Notre Dame, USA, for methane emissions studies           | 1,235,723,351                | Freshwater Sediment       | 3300027902                                                 |
| Freshwater lake sediment microbial communities from the University of Notre Dame, USA, for methane emissions studies           | 1,356,447,832                | Freshwater Sediment       | 3300027900                                                 |
| Freshwater lake sediment microbial communities from the University of Notre Dame, USA, for methane emissions studies           | 1,474,716,571                | Freshwater Sediment       | 3300027896                                                 |
| Sediment microbial communities from wetlands near Prado wetlands, California, USA                                              | 1,906,967,011                | Freshwater Sediment       | 3300037458                                                 |
| Sediment microbial communities from wetlands near Prado wetlands, California, USA                                              | 2,119,703,235                | Freshwater Sediment       | 3300037524                                                 |
| Sediment microbial communities from wetlands near Prado wetlands, California, USA                                              | 2,289,580,168                | Freshwater Sediment       | 3300037461                                                 |
| Sediment microbial communities from wetlands near Prado wetlands, California, USA                                              | 1,646,841,975                | Freshwater Sediment       | 3300037408                                                 |
| Freshwater microbial communities from Lake Tanganyika, Tanzania                                                                | 2,767,785,519                | Freshwater                | 3300020109, 3300020220                                     |
| Freshwater microbial communities from Lake Tanganyika, Tanzania                                                                | 1,302,498,413                | Freshwater                | 3300020222                                                 |
| Freshwater microbial communities from Lake Tanganyika, Tanzania                                                                | 1,273,692,525                | Freshwater                | 3300020084                                                 |
| Freshwater microbial communities from Lake Tanganyika, Tanzania                                                                | 1,460,997,943                | Freshwater                | 3300020074                                                 |
| Freshwater microbial communities from Lake Fryxell liffot mats and glacier meltwater in Antarctica                             | 1,609,619,801                | Freshwater                | 3300009032                                                 |
| Freshwater microbial communities from Lake Fryxell liffot mats and glacier meltwater in Antarctica                             | 1,606,851,264                | Freshwater                | 3300009084                                                 |
| Freshwater microbial communities from Lake Fryxell liffot mats and glacier meltwater in Antarctica                             | 1,628,106,102                | Freshwater                | 3300009083                                                 |
| Freshwater microbial communities from Lake Fryxell liffot mats and glacier meltwater in Antarctica                             | 1,278,739,541                | Freshwater                | 3300007521                                                 |
| Freshwater microbial communities from Lake Bonney liffot mats and glacier meltwater in Antarctica                              | 1,474,819,565                | Freshwater                | 3300007519                                                 |
| Freshwater microbial communities from Lake Mendota, Madison, Wisconsin, United States                                          | 1,326,969,174                | Freshwater                | 3300035666                                                 |
| Freshwater microbial communities from Lake Mendota, Madison, Wisconsin, United States                                          | 1,596,428,758                | Freshwater                | 3300036719                                                 |
| Freshwater microbial communities from Lake Mendota, Madison, Wisconsin, United States                                          | 2,099,022,913                | Freshwater                | 3300034101, 3300034284                                     |
| Freshwater microbial communities from Lake Mendota, Madison, Wisconsin, United States                                          | 2,061,414,356                | Freshwater                | 3300034272, 3300034280                                     |
| Freshwater microbial communities from meromictic Lake La Cruz, Castile                                                         | 3,391,824,087                | Freshwater                | 3300029286, 3300028581, 3300029288                         |
| Freshwater microbial communities from meromictic Lake La Cruz, Castile                                                         | 1,486,589,259                | Freshwater                | 3300027970, 3300028569                                     |
| Freshwater microbial communities from Lake Lanier, Atlanta, Georgia, United States                                             | 4,054,488,353                | Freshwater                | 3300023184, 3300023174, 3300022752, 3300023179             |
| Marine sediment microbial communities from subtidal zone of North Sea                                                          | 1,535,122,492                | Marine Sediment           | 3300028600                                                 |
| Marine sediment microbial communities from subtidal zone of North Sea                                                          | 1,029,147,879                | Marine Sediment           | 3300028599                                                 |
| Marine sediment microbial communities off the coast of San Francisco, CA, United States                                        | 1,647,702,068                | Marine Sediment           | 3300037489                                                 |
| Marine sediment microbial communities off the coast of San Francisco, CA, United States                                        | 2,382,593,820                | Marine Sediment           | 3300038629                                                 |
| Marine sediment microbial communities off the coast of San Francisco, CA, United States                                        | 1,117,689,729                | Marine Sediment           | 3300037835                                                 |
| Marine sediment microbial communities off the coast of San Francisco, CA, United States                                        | 1,323,119,854                | Marine Sediment           | 3300037521                                                 |
| Marine sediment microbial communities off the coast of San Francisco, CA, United States                                        | 1,109,151,697                | Marine Sediment           | 3300037450                                                 |
| Marine sediment microbial communities off the coast of San Francisco, CA, United States                                        | 2,555,594,725                | Marine Sediment           | 3300038548                                                 |
| Marine sediment microbial communities off the coast of San Francisco, CA, United States                                        | 1,286,123,733                | Marine Sediment           | 3300037459                                                 |
| Marine sediment microbial communities off the coast of San Francisco, CA, United States                                        | 1,241,427,685                | Marine Sediment           | 3300037460                                                 |
| Marine sediment microbial communities off the coast of San Francisco, CA, United States                                        | 1,687,513,841                | Marine Sediment           | 3300037540                                                 |
| Marine sediment microbial communities off the coast of San Francisco, CA, United States                                        | 1,507,997,651                | Marine Sediment           | 3300037245                                                 |
| Marine sediment microbial communities off the coast of San Francisco, CA, United States                                        | 1,376,019,208                | Marine Sediment           | 3300037247                                                 |
| Marine sediment microbial communities off the coast of San Francisco, CA, United States                                        | 2,233,392,739                | Marine Sediment           | 3300037246, 3300022413                                     |
| Coastal sediment microbial communities from Delaware Bay, Delaware, United States                                              | 1,697,423,932                | Marine Sediment           | 3300032136                                                 |
| Coastal sediment microbial communities from Oude Bieten Haven, Netherlands                                                     | 801,797,914                  | Marine Sediment           | 3300032251                                                 |
| Coastal sediment microbial communities from Maine, United States                                                               | 1,509,772,824                | Marine Sediment           | 3300033429                                                 |
| Coastal sediment microbial communities from Maine, United States                                                               | 1,508,653,967                | Marine Sediment           | 3300032272                                                 |
| Coastal sediment microbial communities from Maine, United States                                                               | 1,396,560,300                | Marine Sediment           | 3300032231                                                 |
| Coastal sediment microbial communities from Maine, United States                                                               | 1,298,677,993                | Marine Sediment           | 3300032258                                                 |
| Coastal sediment microbial communities from Maine, United States                                                               | 1,135,204,813                | Marine Sediment           | 3300032259                                                 |
| Coastal sediment microbial communities from Maine, United States                                                               | 1,016,401,552                | Marine Sediment           | 3300032262                                                 |

|                                                                                                                     |               |                               |                                                                                    |  |  |  |  |
|---------------------------------------------------------------------------------------------------------------------|---------------|-------------------------------|------------------------------------------------------------------------------------|--|--|--|--|
| Coastal sediment microbial communities from Maine, United States                                                    | 1,157,046,311 | Marine Sediment               | 3300032260                                                                         |  |  |  |  |
| Marine microbial communities from station ALOHA, North Pacific Subtropical Gyre                                     | 2,957,439,220 | Seawater                      | 3300032820                                                                         |  |  |  |  |
| Marine microbial communities from station ALOHA, North Pacific Subtropical Gyre                                     | 2,217,368,920 | Seawater                      | 3300032278                                                                         |  |  |  |  |
| Marine microbial communities from station ALOHA, North Pacific Subtropical Gyre                                     | 1,666,929,232 | Seawater                      | 3300032006                                                                         |  |  |  |  |
| Marine microbial communities from station ALOHA, North Pacific Subtropical Gyre                                     | 1,247,814,780 | Seawater                      | 3300031785                                                                         |  |  |  |  |
| Marine microbial communities from western Arctic Ocean                                                              | 2,003,936,505 | Seawater                      | 3300009786, 3300009173                                                             |  |  |  |  |
| Marine microbial communities from western Arctic Ocean                                                              | 1,801,075,760 | Seawater                      | 3300009409, 3300009706                                                             |  |  |  |  |
| Marine microbial communities from western Arctic Ocean                                                              | 2,592,698,426 | Seawater                      | 3300009420, 3300009526, 3300009705, 3300009785                                     |  |  |  |  |
| Marine microbial communities from western Arctic Ocean                                                              | 3,100,549,849 | Seawater                      | 3300031802, 3300031804, 3300036808                                                 |  |  |  |  |
| Seawater microbial communities from Jarvis Inlet, British Columbia, Canada                                          | 2,779,312,094 | Seawater                      | 3300024518, 3300024520, 3300027865, 3300027881                                     |  |  |  |  |
| Seawater microbial communities from Amundsen Gulf, Northwest Territories, Canada                                    | 1,727,509,430 | Seawater                      | 3300024521, 3300027872, 3300027997                                                 |  |  |  |  |
| Seawater microbial communities from Saanich Inlet, British Columbia, Canada                                         | 1,587,034,760 | Seawater                      | 3300023210, 3300027861, 3300028045                                                 |  |  |  |  |
| Seawater microbial communities from eastern tropical North Pacific Ocean                                            | 2,882,053,374 | Seawater                      | 3300035157, 3300035202, 3300035203, 3300036767                                     |  |  |  |  |
| Seawater microbial communities from, Arabian Sea, Indian Ocean                                                      | 3,094,561,910 | Seawater                      | 3300035204, 3300035205, 3300035206, 3300035250                                     |  |  |  |  |
| Agave microbial communities from Guanajuato, Mexico                                                                 | 1,044,017,924 | Host-Associated (Phylosphere) | 3300005562, 3300006020, 3300030499, 3300009144, 3300027809, 3300030505, 3300030497 |  |  |  |  |
| Agave microbial communities from Guanajuato, Mexico                                                                 | 1,110,787,892 | Host-Associated (Phylosphere) | 3300005661, 3300010395, 3300030515                                                 |  |  |  |  |
| Agave microbial communities from Guanajuato, Mexico                                                                 | 738,289,986   | Host-Associated (Phylosphere) | 3300027761, 3300030512, 3300030516                                                 |  |  |  |  |
| Phylosphere microbial communities from UC Gill Tract Community Farm, Albany, California, United States              | 1,300,189,725 | Host-Associated (Phylosphere) | 3300031088, 3300031419                                                             |  |  |  |  |
| Phylosphere microbial communities from UC Gill Tract Community Farm, Albany, California, United States              | 935,592,278   | Host-Associated (Phylosphere) | 3300031132, 3300031370, 3300031418                                                 |  |  |  |  |
| Phylosphere microbial communities from UC Gill Tract Community Farm, Albany, California, United States              | 1,578,246,309 | Host-Associated (Phylosphere) | 3300031134, 3300031413                                                             |  |  |  |  |
| Phylosphere microbial communities from UC Gill Tract Community Farm, Albany, California, United States              | 1,890,101,419 | Host-Associated (Phylosphere) | 3300031087, 3300031110, 3300031133                                                 |  |  |  |  |
| Phylosphere microbial communities from UC Gill Tract Community Farm, Albany, California, United States              | 1,739,354,604 | Host-Associated (Phylosphere) | 3300031084, 3300031112, 3300031420                                                 |  |  |  |  |
| Phylosphere microbial communities from UC Gill Tract Community Farm, Albany, California, United States              | 1,931,146,294 | Host-Associated (Phylosphere) | 3300031372, 3300031414, 3300031416, 3300031417                                     |  |  |  |  |
| Host-associated microbial community of the marine sponge <i>Aplysina aerophoba</i> from Gulf of Piran, Adriatic Sea | 1,000,911,300 | Host-Associated               | 3300002222, 3300002150, 3300027328, 3300027951                                     |  |  |  |  |
| Host-associated microbial community of the marine sponge <i>Aplysina aerophoba</i> from Gulf of Piran, Adriatic Sea | 1,111,906,834 | Host-Associated               | 3300002159, 3300002448, 3300002147, 3300027327, 3300027386                         |  |  |  |  |
| Host-associated microbial community of the marine sponge <i>Aplysina aerophoba</i> from Gulf of Piran, Adriatic Sea | 1,324,284,378 | Host-Associated               | 3300002160, 3300002151, 3300027391, 3300027532                                     |  |  |  |  |
| Marine algal microbial communities from Sidmouth, United Kingdom                                                    | 1,003,807,699 | Host-Associated               | 3300009417, 3300009439, 3300009446                                                 |  |  |  |  |
| Marine algal microbial communities from Sidmouth, United Kingdom                                                    | 1,031,151,631 | Host-Associated               | 3300009073, 3300009415, 3300009421, 3300027028                                     |  |  |  |  |
| Tube worm associated microbial communities from hydrothermal vent at the East Pacific Rise, Pacific Ocean           | 1,278,100,677 | Host-Associated               | 3300028026, 3300028029, 3300028042, 3300028534                                     |  |  |  |  |
| Rumen microbial communities from sheep, dairy cows and beef cattle from various locations                           | 2,488,892,422 | Host-Associated               | 3300028805                                                                         |  |  |  |  |
| Rumen microbial communities from sheep, dairy cows and beef cattle from various locations                           | 1,559,553,778 | Host-Associated               | 3300037453                                                                         |  |  |  |  |
