# Supplementary material for: Metagenomic data reveals type I polyketide synthase distributions across biomes
Source: PubMed Central journal article supplement (PMC10308959; doi:10.1128/msystems.00012-23), 2023-06-05
Supplement: msystems.00012-23-s0002.pdf [file msystems.00012-23-s0002.pdf]

**Table S1 (attached separately) - Summary table of all metagenomes analyzed using NaPDoS2 . All metagenomes are listed along with the biome type they fall under and the total size of the metagenome (base pairs).**

| Class                    | Subclass           | All biomes | Forest /<br>Agricultural<br>soil | Peat Soil | Rhizosphere | Marine<br>Sediment | Freshwater<br>Sediment | Host-associated | Seawater | Freshwater |
|--------------------------|--------------------|------------|----------------------------------|-----------|-------------|--------------------|------------------------|-----------------|----------|------------|
| Modular <i>cis</i> -AT   | No subclass        | 13186      | 3381                             | 2539      | 1790        | 951                | 1070                   | 1275            | 951      | 1229       |
|                          | Hybrid KS          | 6655       | 1452                             | 1105      | 1316        | 907                | 687                    | 326             | 318      | 544        |
|                          | Loading<br>module  | 864        | 215                              | 139       | 152         | 129                | 54                     | 98              | 21       | 56         |
|                          | Olefin<br>synthase | 719        | 135                              | 79        | 121         | 98                 | 58                     | 27              | 99       | 102        |
| Iterative <i>cis</i> -AT | PUFA               | 7346       | 460                              | 791       | 386         | 2750               | 899                    | 134             | 1141     | 785        |
|                          | No subclass        | 1523       | 264                              | 178       | 218         | 204                | 229                    | 104             | 204      | 122        |
|                          | Eneidyne           | 1044       | 173                              | 132       | 153         | 403                | 66                     | 12              | 49       | 56         |
|                          | Aromatic           | 355        | 140                              | 48        | 79          | 4                  | 34                     | 10              | 7        | 33         |
| <i>trans</i> -AT         | PTM-type           | 207        | 44                               | 39        | 36          | 21                 | 14                     | 6               | 10       | 37         |
|                          | No subclass        | 3061       | 683                              | 625       | 473         | 345                | 113                    | 291             | 177      | 354        |
|                          | Hybrid KS          | 156        | 26                               | 35        | 27          | 12                 | 10                     | 15              | 16       | 15         |
|                          | Total KSs          | 35116      | 6973                             | 5710      | 4751        | 5824               | 3234                   | 2298            | 2993     | 3333       |
| Type I FAS               |                    | 409        | 93                               | 36        | 58          | 10                 | 35                     | 94              | 45       | 38         |

**Table S2 - Type I KS hits classified by NaPDoS2.** Type I KS domains listed by NaPDoS2 class and subclass across eight biomes, with the total KS hits across all biomes listed in the third column. The total number of Type I KS hits across all classes is listed in the second to last row. Type I FAS hits were not included in these totals and are listed in the last row.

**Key:** Metagenome (IMG accession): **Number + classification of NaPDoS2 KS domain hits**

▼ NaPDoS2 KS domain class & subclass

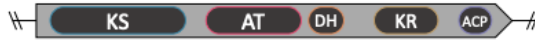

antiSMASH 6.0 BGC type; KS domain classification. Length of BGC (contig length) in bp.

Switchgrass rhizosphere (IMG 3300005719): **1 *trans*-AT KS domain**

***Trans*-AT KS**

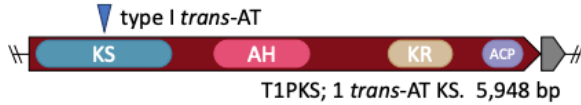

Hardwood forest soil Indiana (IMG 3300031715): **10 *trans*-AT KS domains**

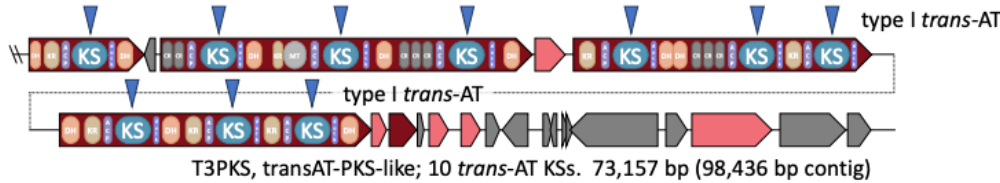

Miscanthus rhizosphere (IMG 3300025926): **1 *trans*-AT KS domain**

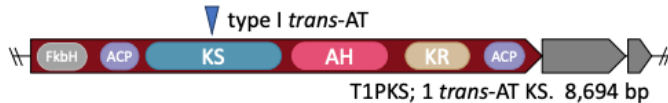

Forest soil California (IMG 3300035667): **2 *cis*-AT KS domains**

***Cis*-AT KS**

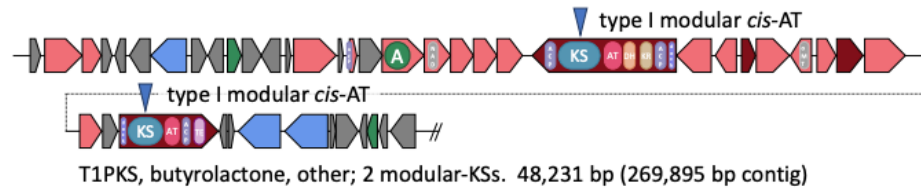

Miscanthus rhizosphere (IMG 3300025926): **1 modular *cis*-AT hybrid KS domain**

***Cis*-AT hybrid KS**

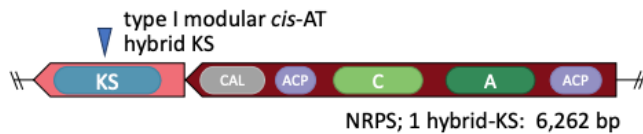

Switchgrass rhizosphere (IMG 3300025986):

**Mixed *trans/cis*-AT hybrid KS**

**1 type II FAS, 1 *trans*-AT hybrid KS, 1 modular *cis*-AT hybrid KS domain**

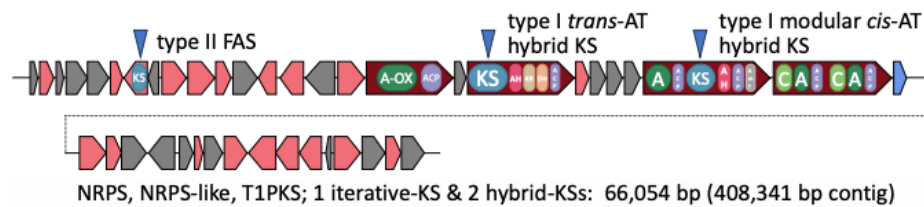

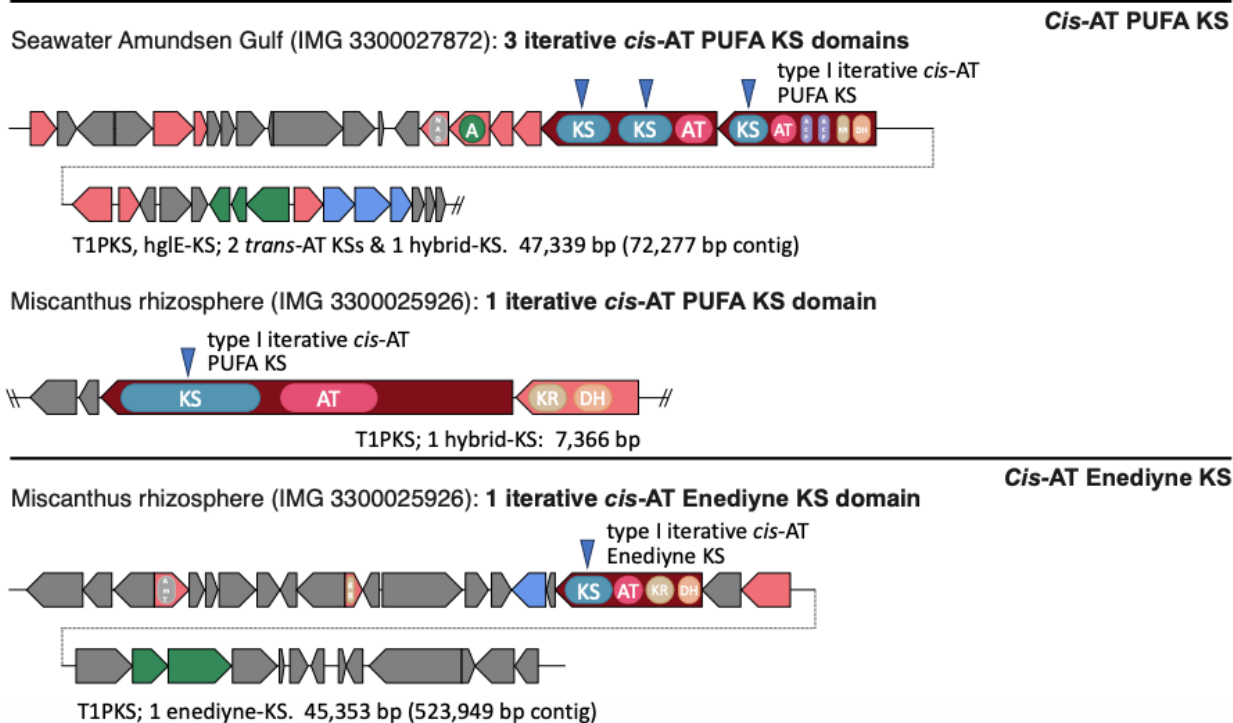

### Figure S1 – Validation of NaPDoS2 KS classifications.

The classification of KSs identified by NaPDoS2 was assessed by examining their genomic environment in the metagenomic assemblies. They were located using blastP and the JGI IMG interface to query KS domains against their respective metagenome and the scaffold/contig associated with the KS hit extracted and run through antiSMASH 6 to identify the associated BGC. Relevant biosynthetic genes were additionally analyzed using the “transATor” and “PKS/NRPS Analysis Web-site” tools for domain annotation. BGCs were drawn and colored as per antiSMASH 6 (maroon = core biosynthetic gene; pink = additional biosynthetic gene; blue = transport-related genes; green = regulatory genes, gray = other genes). Domain position and function were drawn and colored according to antiSMASH, transATor, and the PKS/NRPS Analysis Website NRPS.IGS (blue = KS = ketosynthase; pink = AH acyl hydrolase, AT = acyl transferase; sand = KR = ketoreductase; pale purple = ACP = Phosphopantetheine acyl carrier protein; orange = DH = dehydratase; dark gray = CR = crotonase; light gray = MT = methyltransferase, CAL = Co-enzyme A ligase domain, NAD = Male sterility protein/3-beta hydroxysteroid dehydrogenase-isomerase family, oMT = oxygen methyltransferase, AmT = aminotransferase; light pink = TE = thioesterase; dark blue = dock = PKS docking C/N terminal or Trans-AT docking domain; light green = C = condensation domain; dark green = A = adenylation domain; A-OX = adenylation domain with integrated oxidase). Blue arrows point to KS hits that NaPDoS2 detected and classified from each metagenome shown in their BGC context; arrows are labeled with their NaPDoS2 classification.

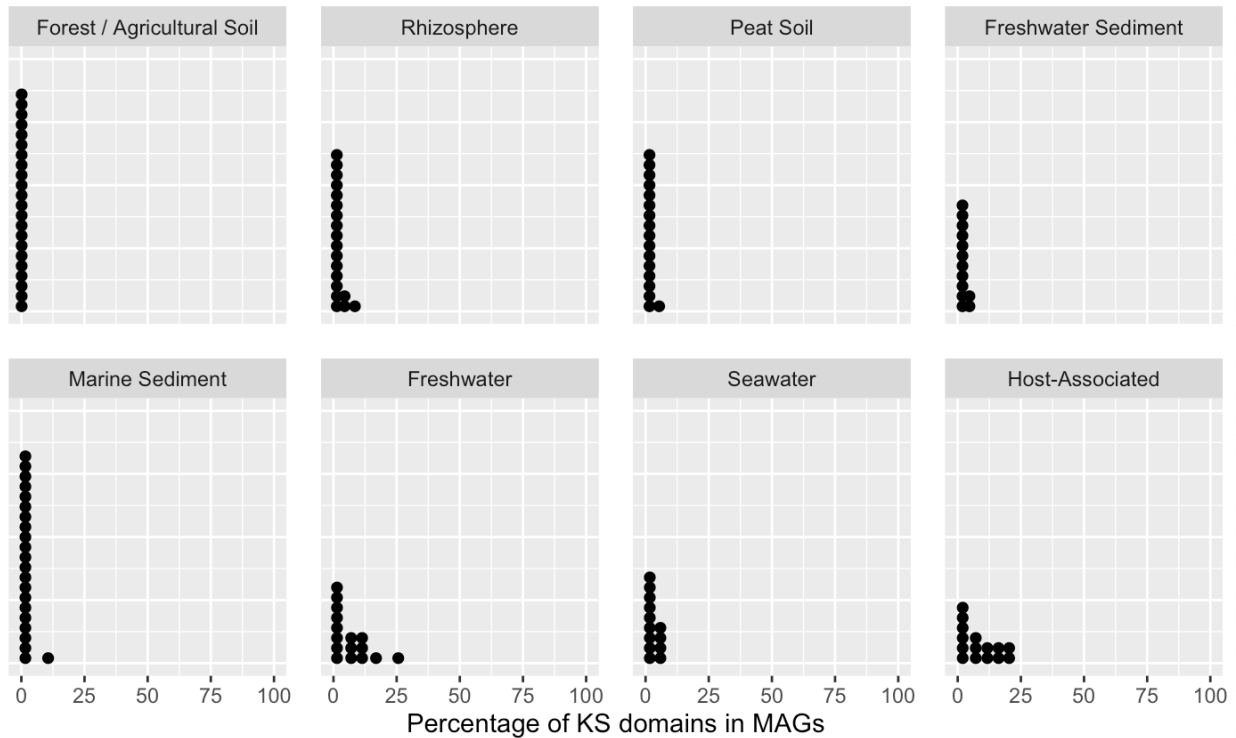

**Figure S2 - Percentage of metagenomic KS domains detected within MAGs.** Individual metagenomes (137 in total from IMG/M) are represented by black circles. MAGs were binned for each metagenome using MetaBAT according to the JGI IMG automated pipeline. The number of KS domains in each metagenome and MAG was determined using NaPDos2 and the percentage of metagenomic KSs occurring in MAGs plotted for each metagenome.

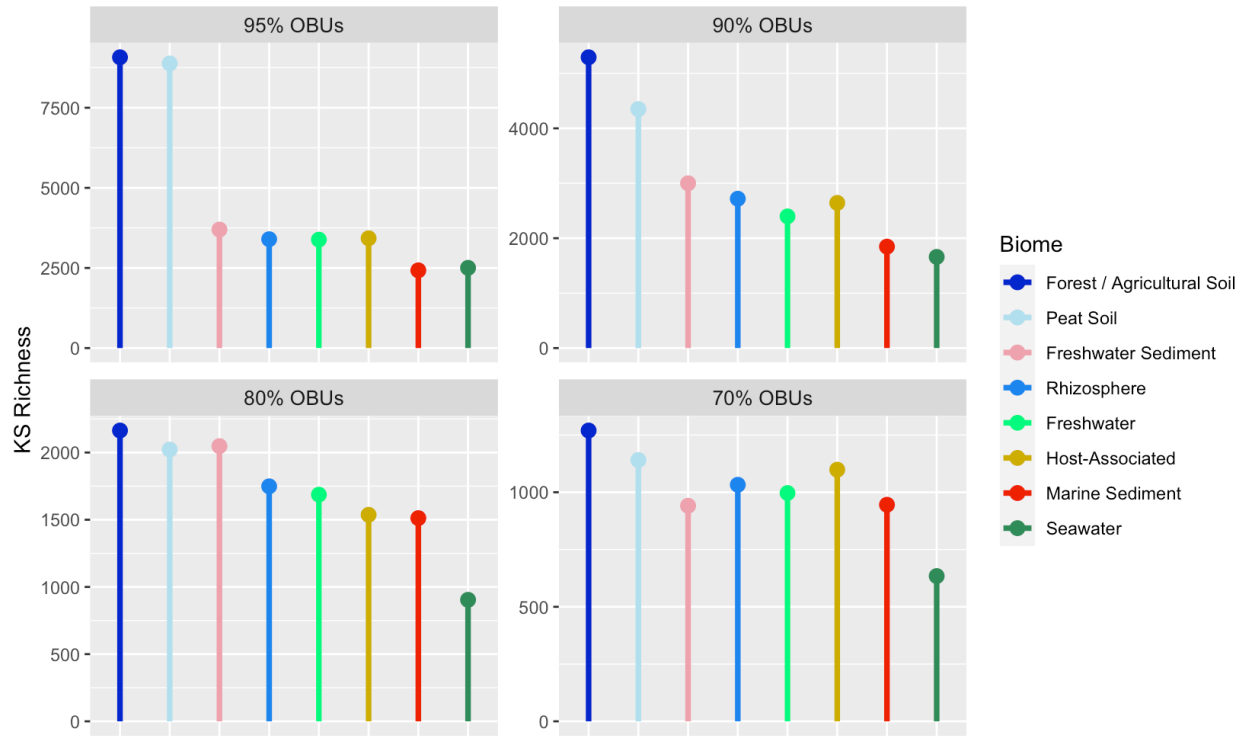

**Figure S3 - KS richness across biomes.** Bar plot showing Chao1 KS richness across eight biomes. For each biome, 580 full-length KS domains were randomly selected and clustered into Operational Biosynthetic Units (OBUs) at four thresholds ranging from 70% to 95% amino acid sequence identity. The average of 10 analyses per biome is plotted.

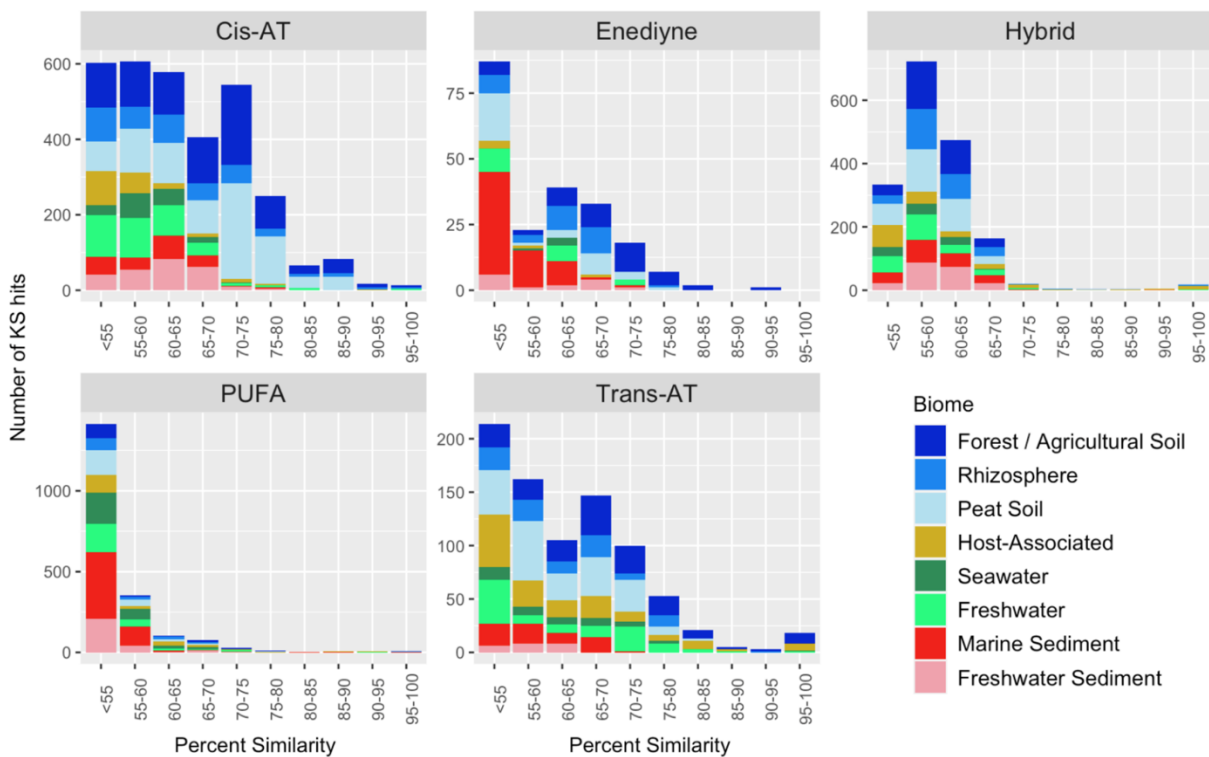

**Figure S4 - Percent similarity of metagenomic KSs with their closest MIBiG 2.0 match.** Stacked bar charts indicate the biome-level abundance (y-axis) of full-length metagenome-extracted KS domains based on percent similarity with their closest MIBiG 2.0 database match (x-axis).

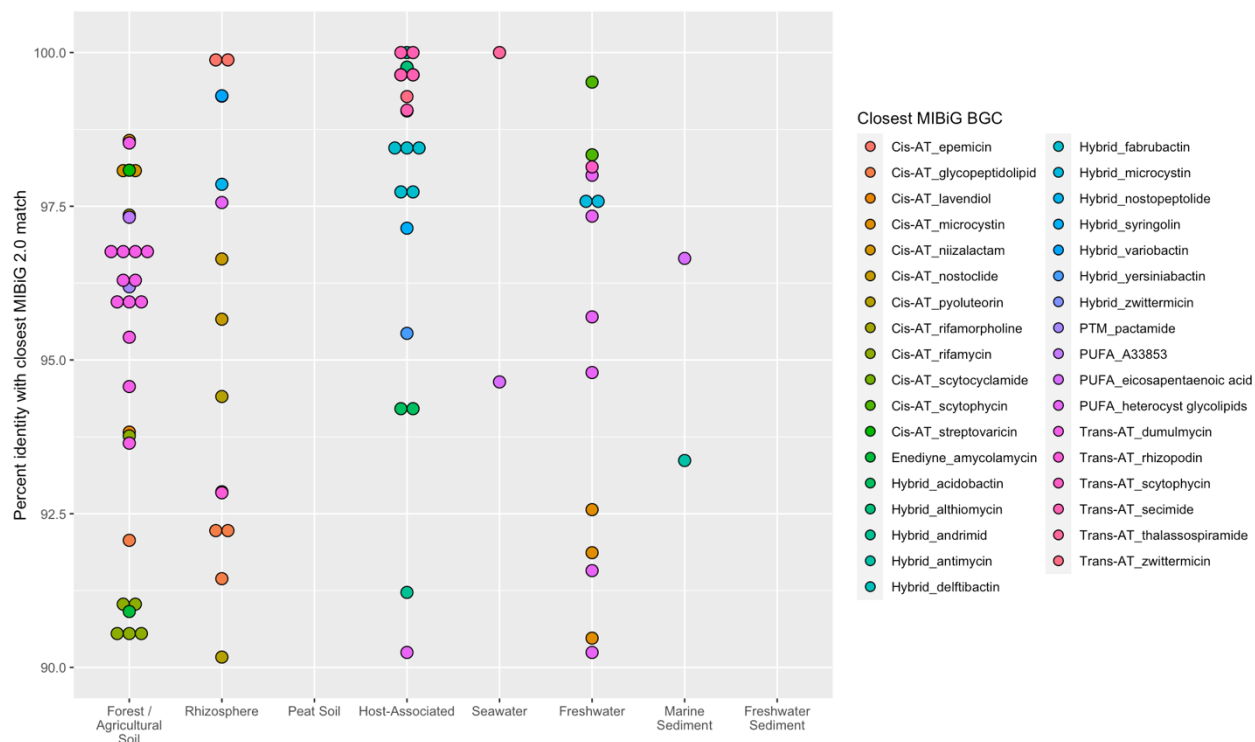

**Figure S5 - Metagenomic KSs with  $\geq 90\%$  sequence identity matches with MIBiG 2.0.** Dotplot indicates the metagenomic KSs with  $\geq 90\%$  sequence identity matches (y-axis) with sequences in the MIBiG 2.0 database. Matches shown by biome (x-axis) and colored by the NaPDoS2 classification. The legend indicates a compound produced by the closest matching MIBiG 2.0 BGC. The BGCs for microcystin, scytophycin, and zwittermicin have KSs belonging to multiple classes.



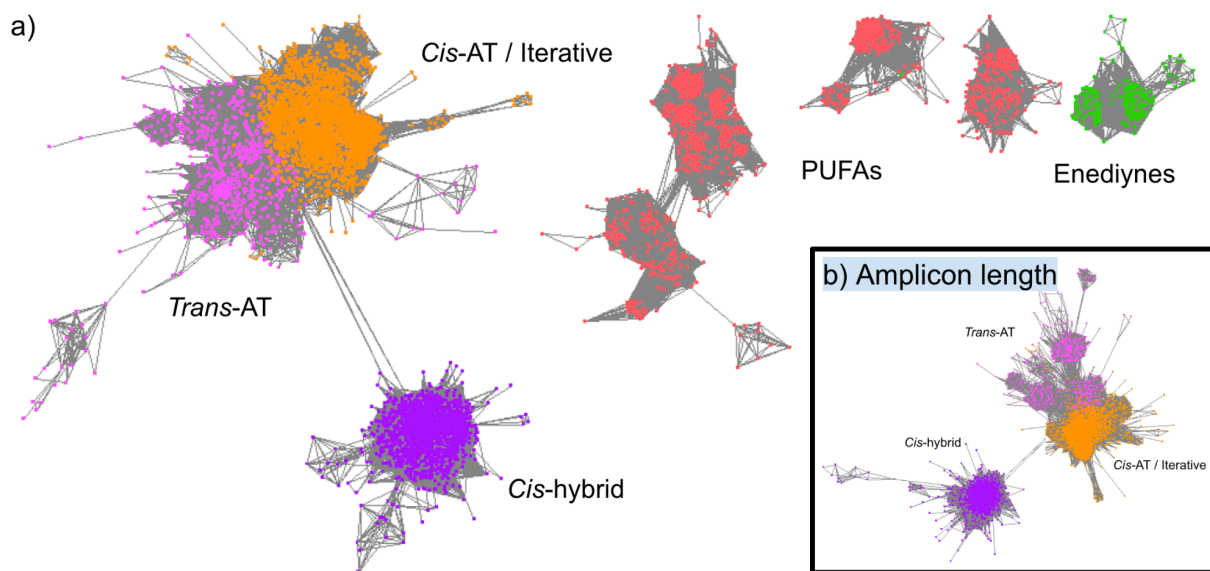

**Figure S6 – Sequence similarity network of type I KS domains.** A) SSN of full-length metagenome-extracted KS domains (amino acid sequences, average length = 420 aa) was constructed using EFI, visualized using Cytoscape, and colored according to NaPDoS2 classification revealing five major groups. The *cis*-AT/iterative group (orange) is a composite of KSs classified by NaPDoS2 as *cis*-AT modular, *cis*-loading, OLS, iterative aromatic, and iterative PTM. B) SSN created using the same methods after shortening the *cis*-AT/iterative, trans-AT, and cis-hybrid KSs to amplicon lengths (amino acids, average length = 138 aa) revealed similar clustering patterns as observed for the full-length KS sequences.

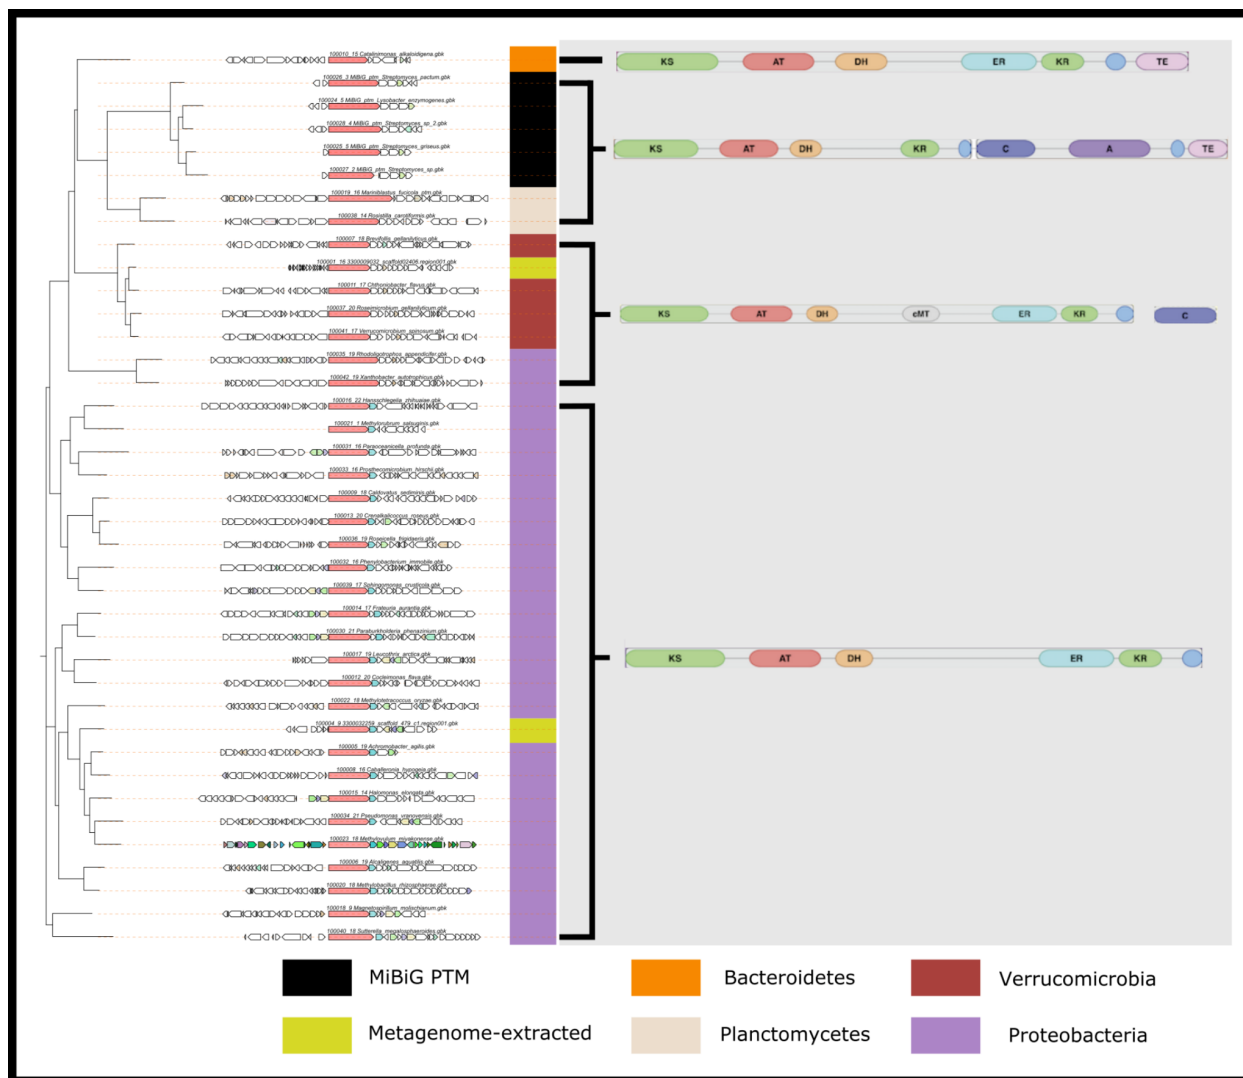

**Figure S7 - Phylogeny and domain organization of the monomodular KS clade.** Sequences within a major clade in the *cis*-AT/iterative KS phylogeny (Fig. 3a, pink) were classified as “iterative PTM” and thus predicted to be associated with monomodular PKS-NRPS genes. Two BGCs of sufficient length were identified in the metagenomes (yellow), analyzed using antiSMASH, and shown to possess PTM-like domain architectures in comparison to MIBiG reference BGCs (black) based on the domain organization of the core biosynthetic gene (pink). Related KSs were identified in RefSeq genomes (colored by taxa) based on NaPDoS2 KS classifications and a multi-locus BGC phylogeny used to show that the metagenome-extracted BGCs are most closely related to sequences observed in Verrucomicrobia and Proteobacteria. Subtle differences in the modular organization among these monomodular systems (brackets) suggests that new PTMs likely remain to be discovered.

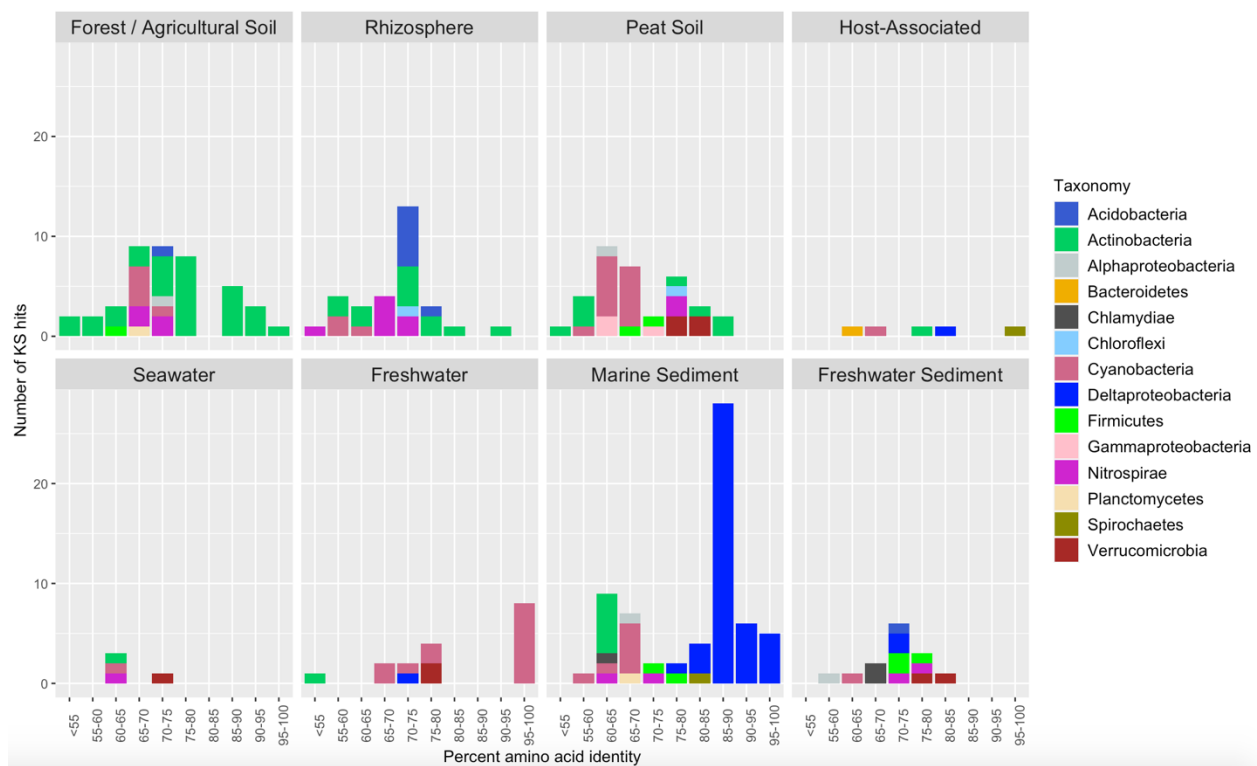

**Figure S8- Eneidyne KS domain distributions across biomes.** Stacked bar charts indicate the phylum-level abundance (y-axis) of full-length metagenome-extracted enediyne KS domains across eight biomes grouped by percent identity with the closest NCBI BLASTp database match (x-axis).

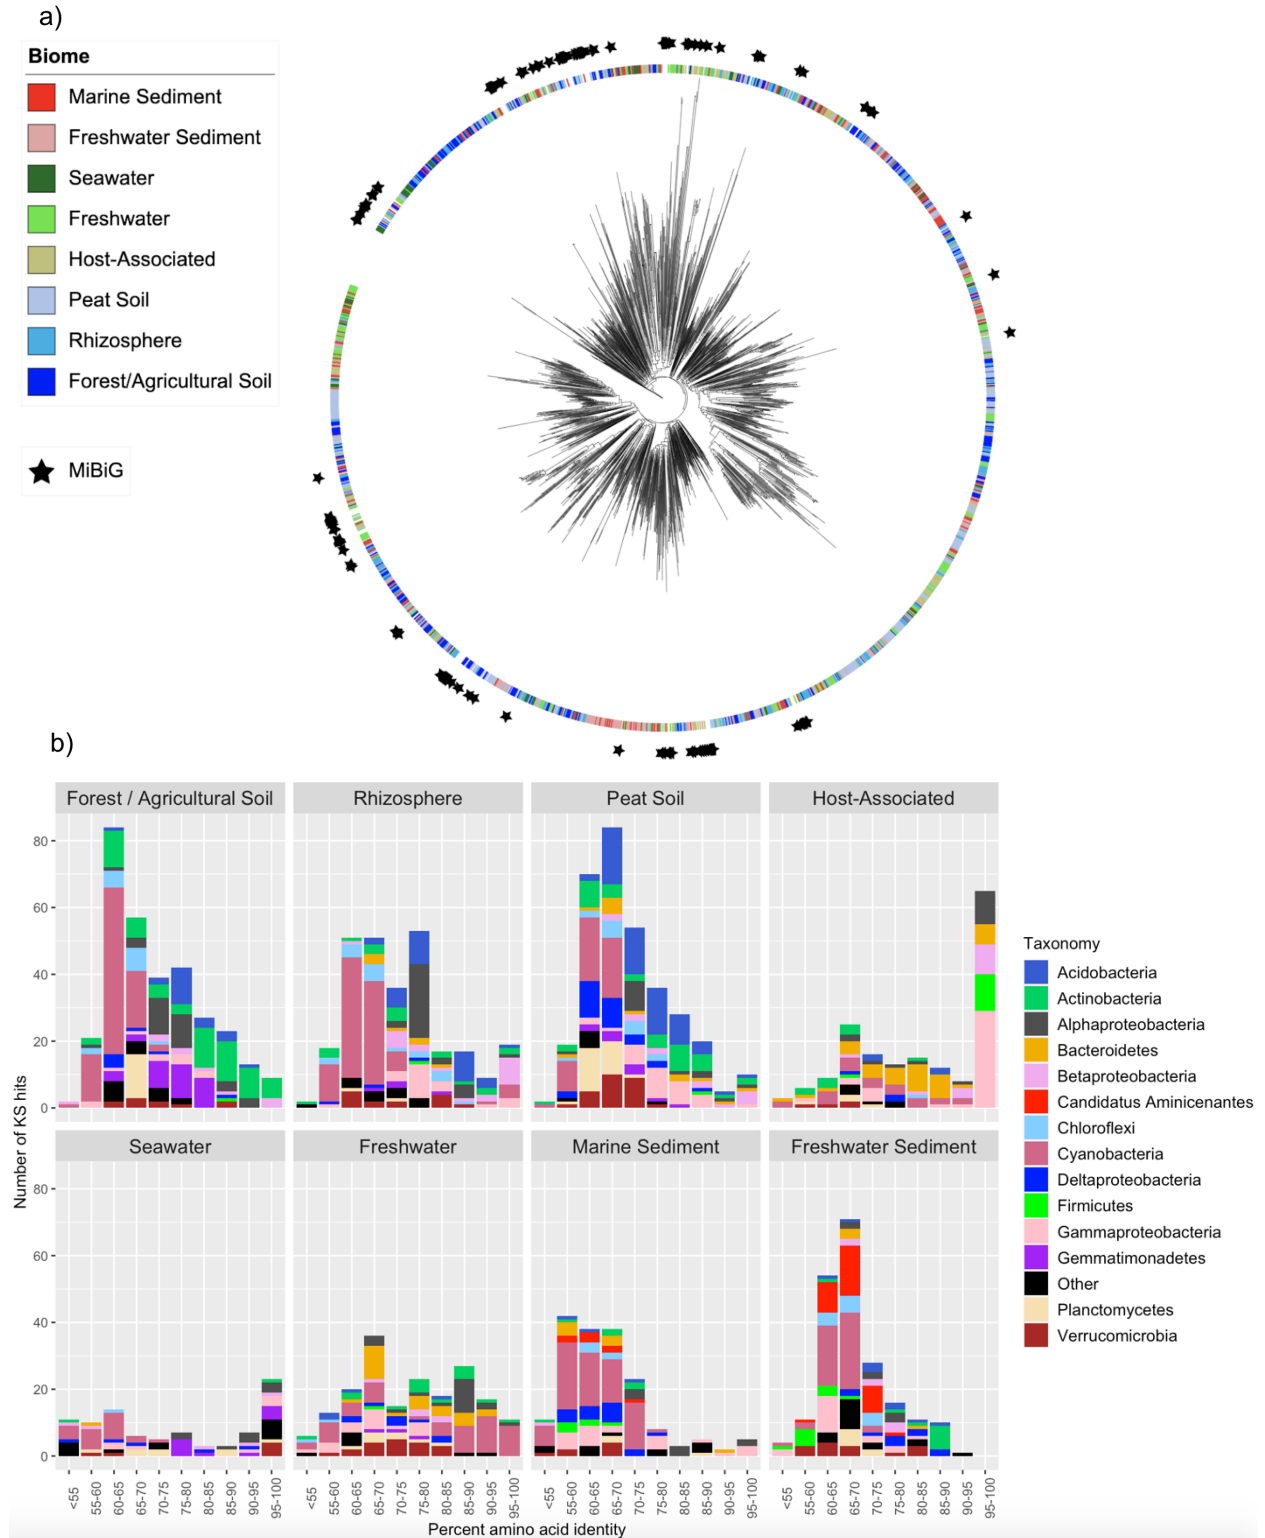

**Figure S9 - *Cis*-hybrid KS domain phylogeny and distributions across biomes.** A) FastME phylogeny generated from full-length metagenome-extracted *cis*-hybrid KS domains ( $n=1746$ , colored by biome) with the position of MiBiG-extracted *cis*-hybrid KS domains shown as black stars. B) Stacked bar charts indicate the phylum-level abundance (y-axis) of full-length

metagenome-extracted *cis*-AT KS domains across eight biomes grouped by percent identity with the closest NCBI BLASTp database match (x-axis).

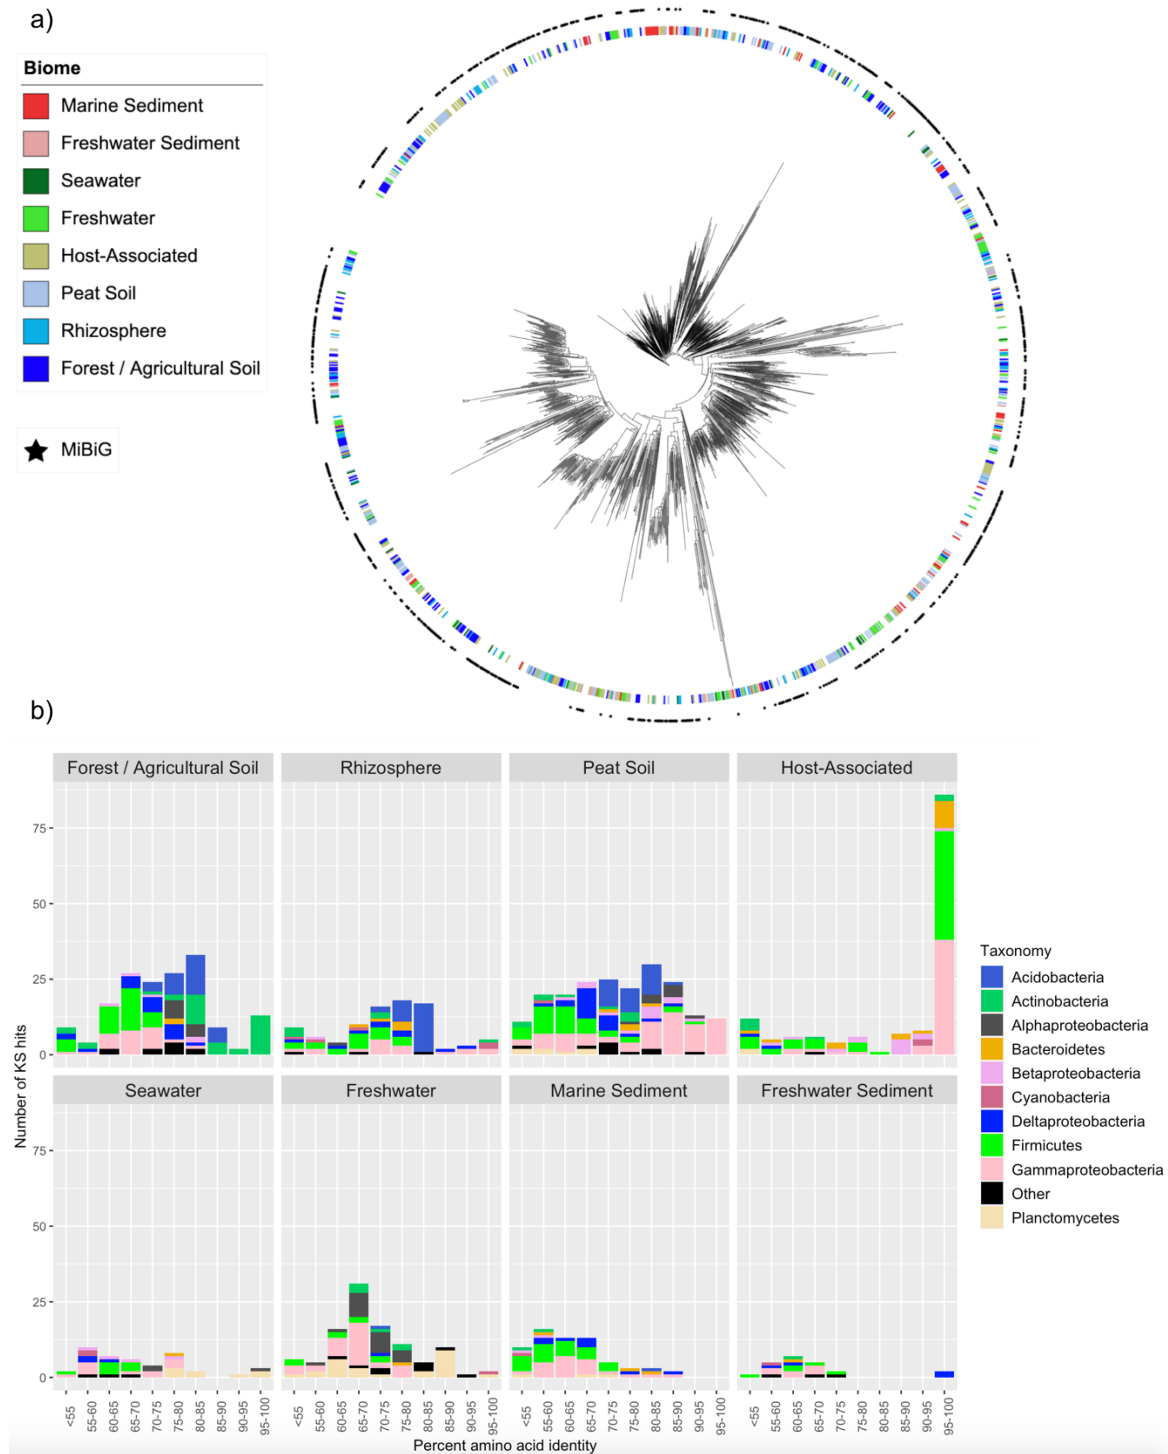

**Figure S10 - *Trans*-AT KSs domain phylogeny and distributions across biomes.** A) FastME phylogeny generated from full-length, metagenome-extracted *trans*-AT KS domains (n=831, colored by biome) with the position of MIBiG-extracted *trans*-AT KS domains shown as black stars. B) Stacked bar charts indicate the phylum-level abundance (y-axis) of full-length metagenome-extracted *trans*-AT KS domains across eight biomes grouped based on percent identity with the closest NCBI BLASTp database match (x-axis).

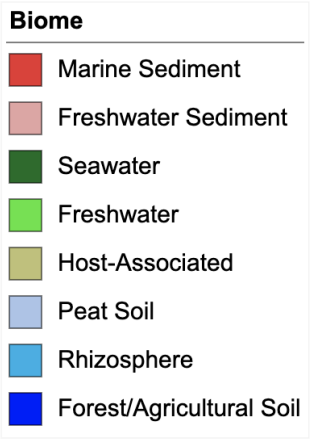

★ MiBiG

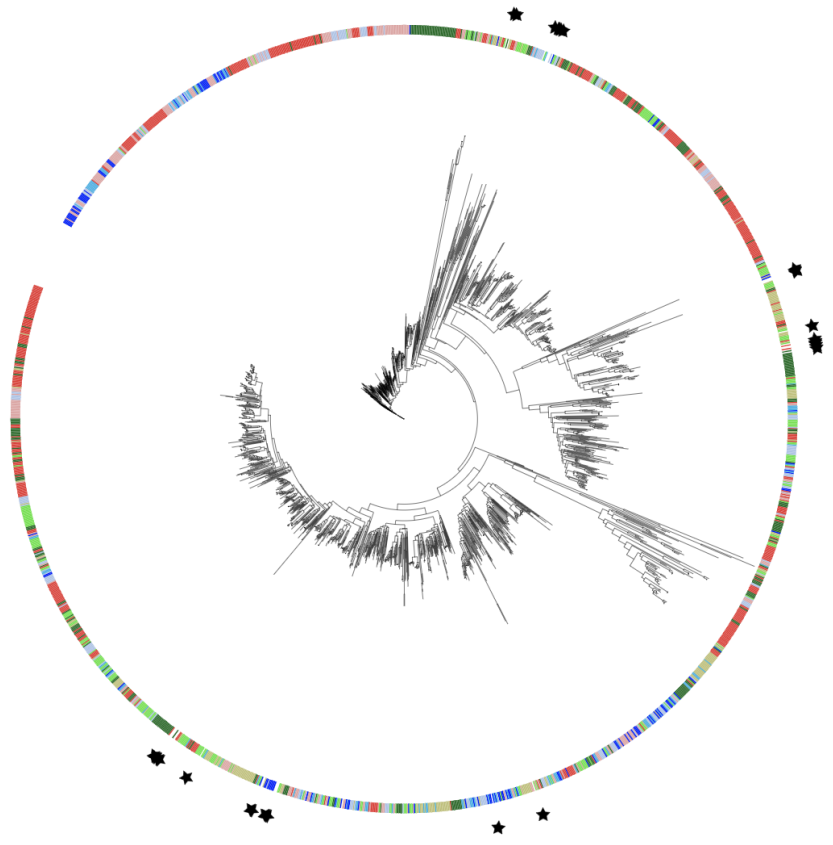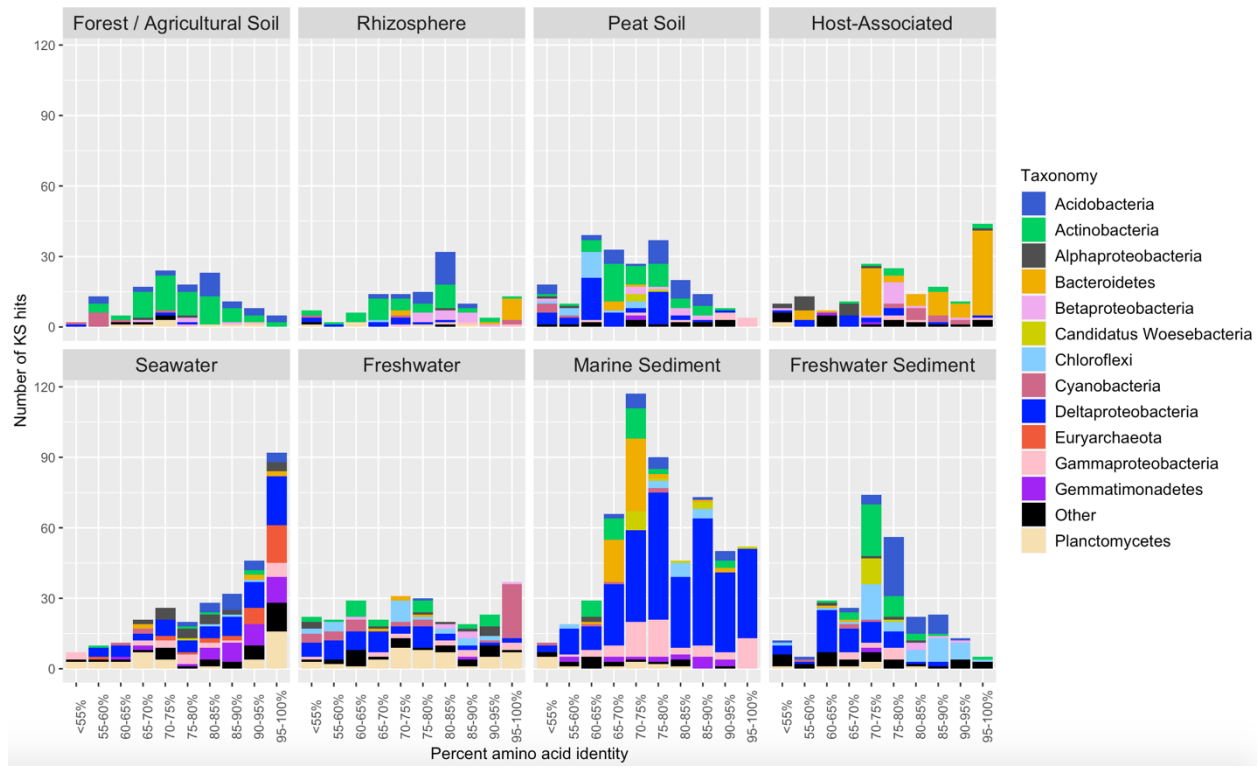

**Figure S11 - PUFA KS domain phylogeny and distributions across biomes.** A) FastME phylogeny generated from full-length metagenome-extracted PUFA KS domains (n=1996, colored by biome) with the position of MIBiG PUFA KS domains shown as black stars. B) Stacked bar charts indicate the phylum-level abundance (y-axis) of full-length metagenome-extracted PUFA KS domains across eight biomes grouped based on percent identity with the closest NCBI BLASTp database match (x-axis).



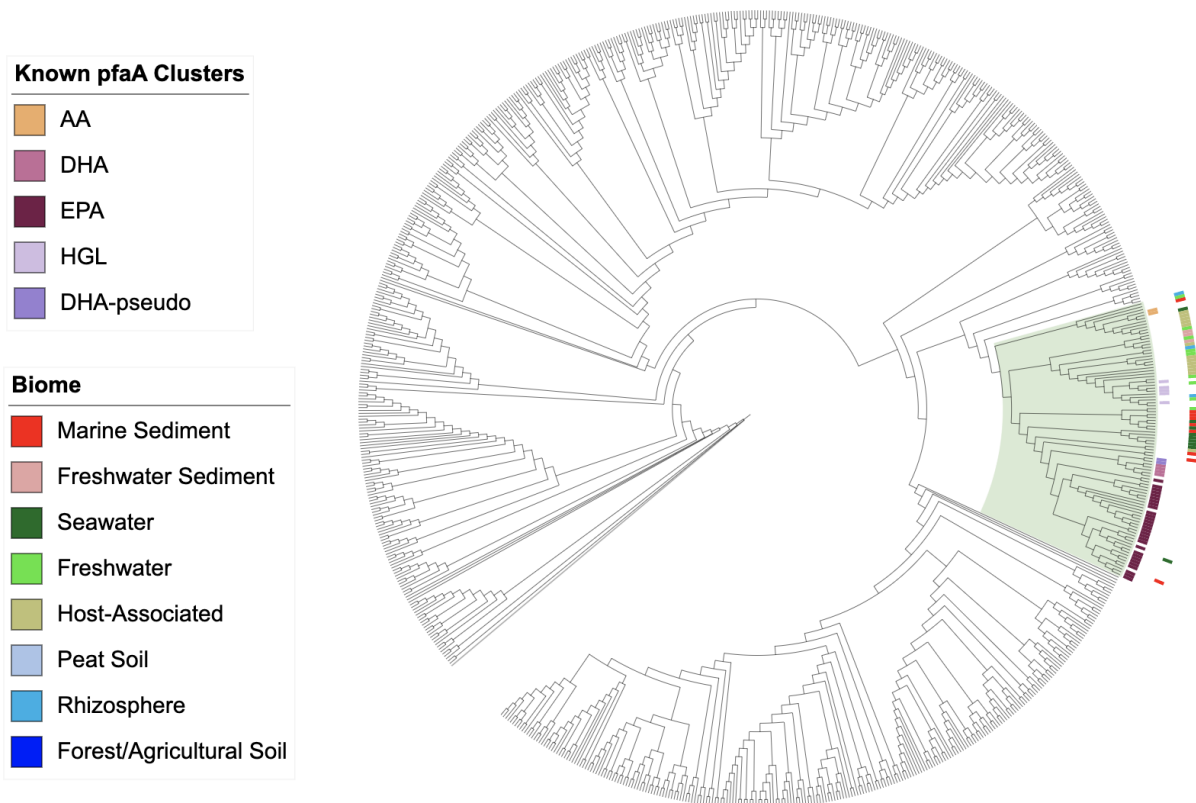

**Figure S12 - pfaA KS domain phylogeny.** FastME phylogeny generated from full-length metagenome extracted PUFA KS domains classified as pfaA (n=1170) compared with previously characterized pfaA BGCs (green highlight) associated with the production of arachidonic acid (AA), docosahexaenoic acid (DHA), eicosapentaenoic acid (EPA), heterocyst glycolipids (HGL), and pseudo-docosahexaenoic acid (pseudo-DHA) (1). Ninety-two percent of the metagenome extracted pfaA KS domains fall outside this clade.

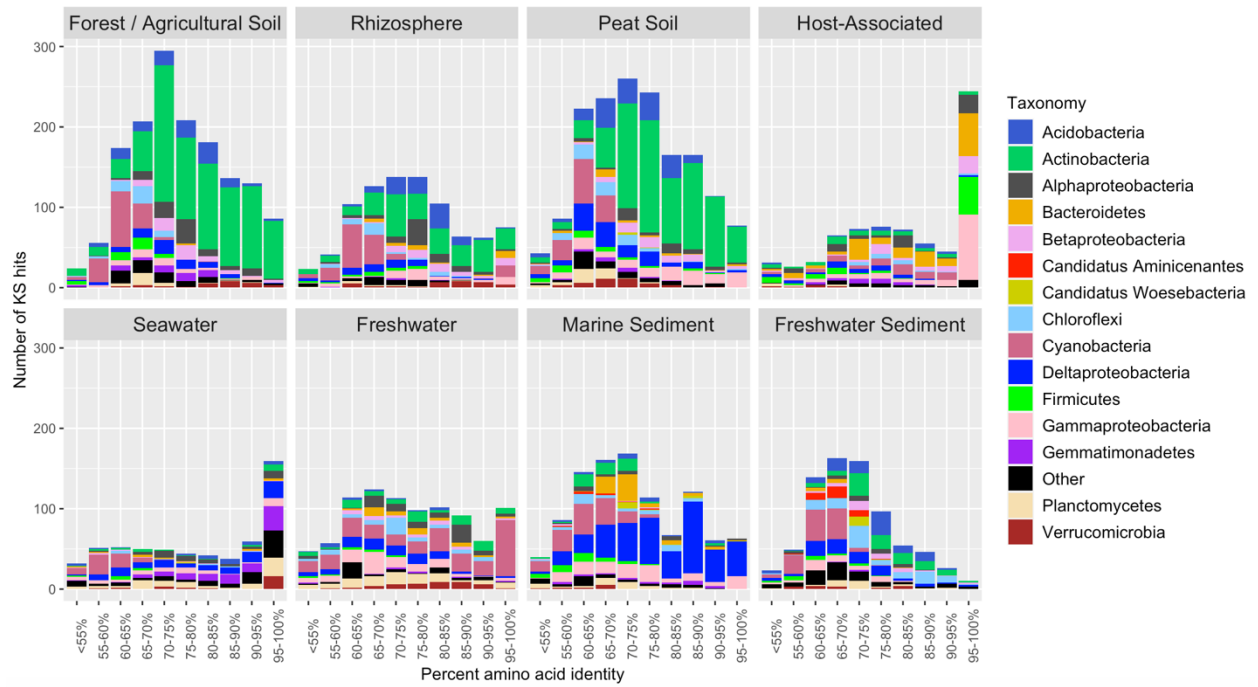

**Figure S13 - Full-length KS domain distributions across biomes.** Stacked bar charts indicate the phylum-level abundance (y-axis) of full-length metagenome-extracted KS domains across eight biomes grouped based on percent identity with the closest NCBI BLASTp database match (x-axis).

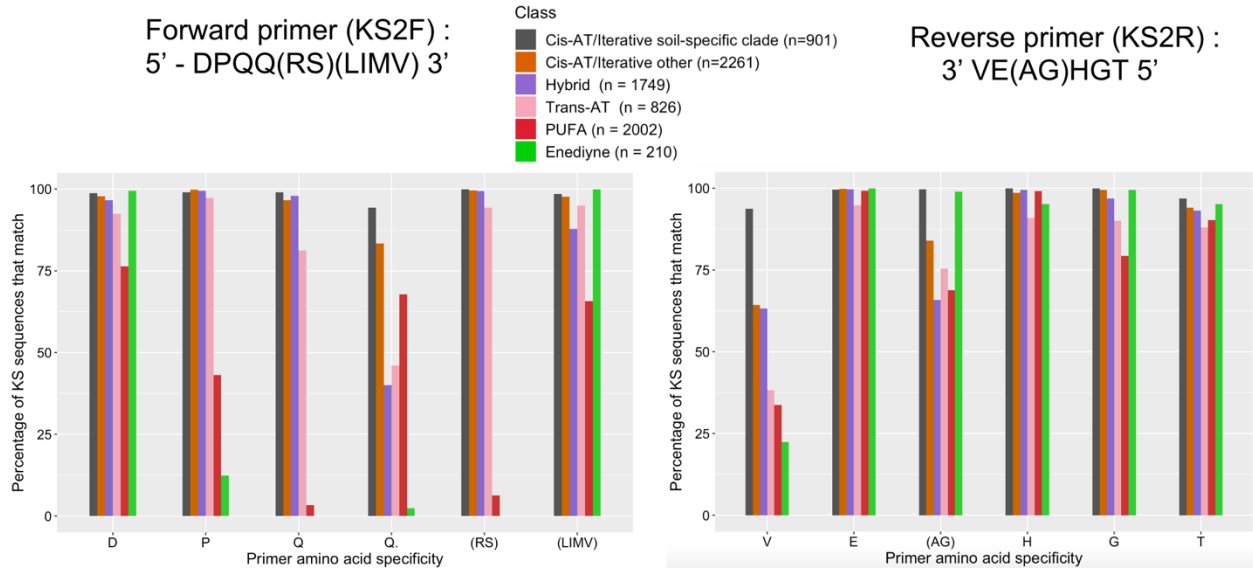

**Figure S14 - Evaluation of the KS2F/R primer set.** Percentage of metagenome-extracted KS amino acid sequences (y-axis) that match the KS2F/R primers at each position. The amino acid specificity of the primers is listed at each position by the one letter code with degeneracy indicated (x-axis). KS sequences are grouped by their NaPDos2 classification. The *cis*-AT/iterative soil-dominant KSs (black) were analyzed separately from all other *cis*-AT/iterative KSs (orange).

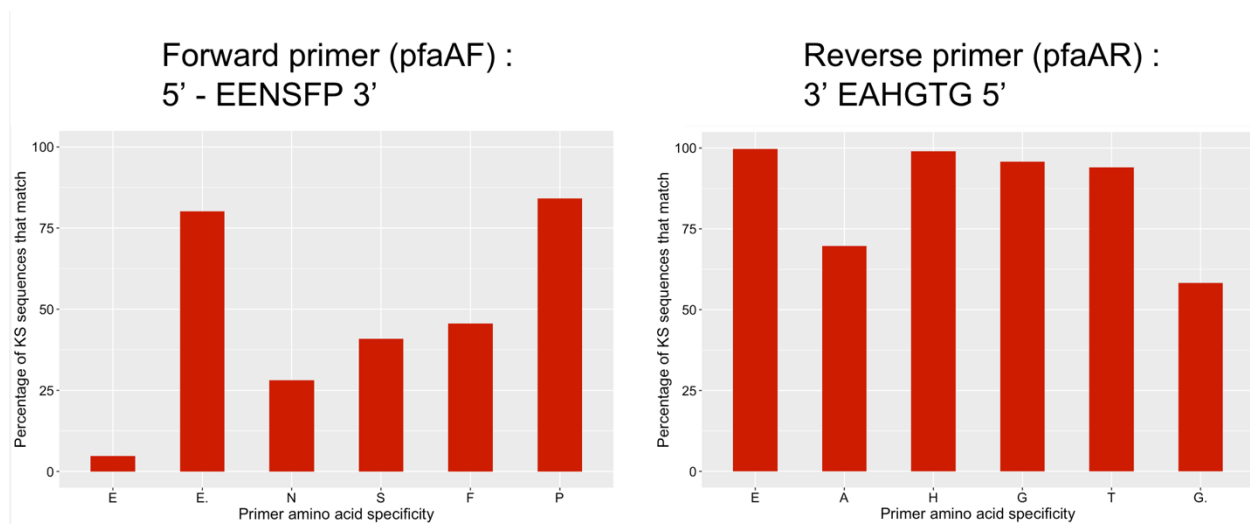

**Figure S15 - Evaluation of the pfaA primer set.** Percentage of metagenome-extracted KS sequences (amino acid format) classified as PUFA pfaA KSs by NaPDoS2 that match the pfaAF/AR primers at each position (y-axis). The amino acid specificity of the primers is listed at each position by the one letter code (x-axis).

## References

1. Shulse CN, Allen EE. 2011. Diversity and distribution of microbial long-chain fatty acid biosynthetic genes in the marine environment. *Environmental Microbiology* 13:684-695.
